# Supplementary material for: Population-based screening methods in biliary atresia: a systematic review and meta-analysis
Source: HighWire-hosted journal article supplement (doi:10.1136/archdischild-2022-324946), 2023-02-16
Supplement: archdischild-2022-324946supp001_data_supplement.pdf [file archdischild-2022-324946supp001_data_supplement.pdf]

Supplementary Appendix - Table 1: PRISMA checklist

| Section/topic             | #  | Checklist item                                                                                                                                                                                                                                                                                              | Reported on page # |
|---------------------------|----|-------------------------------------------------------------------------------------------------------------------------------------------------------------------------------------------------------------------------------------------------------------------------------------------------------------|--------------------|
| <b>TITLE</b>              |    |                                                                                                                                                                                                                                                                                                             |                    |
| Title                     | 1  | Identify the report as a systematic review, meta-analysis, or both.                                                                                                                                                                                                                                         | 1                  |
| <b>ABSTRACT</b>           |    |                                                                                                                                                                                                                                                                                                             |                    |
| Structured summary        | 2  | Provide a structured summary including, as applicable: background; objectives; data sources; study eligibility criteria, participants, and interventions; study appraisal and synthesis methods; results; limitations; conclusions and implications of key findings; systematic review registration number. | 2                  |
| <b>INTRODUCTION</b>       |    |                                                                                                                                                                                                                                                                                                             |                    |
| Rationale                 | 3  | Describe the rationale for the review in the context of what is already known.                                                                                                                                                                                                                              | 4                  |
| Objectives                | 4  | Provide an explicit statement of questions being addressed with reference to participants, interventions, comparisons, outcomes, and study design (PICOS).                                                                                                                                                  | 4 - 6              |
| <b>METHODS</b>            |    |                                                                                                                                                                                                                                                                                                             |                    |
| Protocol and registration | 5  | Indicate if a review protocol exists, if and where it can be accessed (e.g., Web address), and, if available, provide registration information including registration number.                                                                                                                               | 5 - 6              |
| Eligibility criteria      | 6  | Specify study characteristics (e.g., PICOS, length of follow-up) and report characteristics (e.g., years considered, language, publication status) used as criteria for eligibility, giving rationale.                                                                                                      | 5 - 6              |
| Information sources       | 7  | Describe all information sources (e.g., databases with dates of coverage, contact with study authors to identify additional studies) in the search and date last searched.                                                                                                                                  | 5 - 6              |
| Search                    | 8  | Present full electronic search strategy for at least one database, including any limits used, such that it could be repeated.                                                                                                                                                                               | 5 - 6              |
| Study selection           | 9  | State the process for selecting studies (i.e., screening, eligibility, included in systematic review, and, if applicable, included in the meta-analysis).                                                                                                                                                   | 5 - 6              |
| Data collection process   | 10 | Describe method of data extraction from reports (e.g., piloted forms, independently, in duplicate) and any processes for obtaining and confirming data from investigators.                                                                                                                                  | 5 - 6              |

|                                    |    |                                                                                                                                                                                                                        |         |
|------------------------------------|----|------------------------------------------------------------------------------------------------------------------------------------------------------------------------------------------------------------------------|---------|
| Data items                         | 11 | List and define all variables for which data were sought (e.g., PICOS, funding sources) and any assumptions and simplifications made.                                                                                  | 5 - 6   |
| Risk of bias in individual studies | 12 | Describe methods used for assessing risk of bias of individual studies (including specification of whether this was done at the study or outcome level), and how this information is to be used in any data synthesis. | 5 - 6   |
| Summary measures                   | 13 | State the principal summary measures (e.g., risk ratio, difference in means).                                                                                                                                          | 5 - 6   |
| Synthesis of results               | 14 | Describe the methods of handling data and combining results of studies, if done, including measures of consistency (e.g., $I^2$ ) for each meta-analysis.                                                              | 5 - 6   |
| Risk of bias across studies        | 15 | Specify any assessment of risk of bias that may affect the cumulative evidence (e.g., publication bias, selective reporting within studies).                                                                           | 5 - 6   |
| Additional analyses                | 16 | Describe methods of additional analyses (e.g., sensitivity or subgroup analyses, meta-regression), if done, indicating which were pre-specified.                                                                       | 5 - 6   |
| <b>RESULTS</b>                     |    |                                                                                                                                                                                                                        |         |
| Study selection                    | 17 | Give numbers of studies screened, assessed for eligibility, and included in the review, with reasons for exclusions at each stage, ideally with a flow diagram.                                                        | 7       |
| Study characteristics              | 18 | For each study, present characteristics for which data were extracted (e.g., study size, PICOS, follow-up period) and provide the citations.                                                                           | 7       |
| Risk of bias within studies        | 19 | Present data on risk of bias of each study and, if available, any outcome level assessment (see item 12).                                                                                                              | 7       |
| Results of individual studies      | 20 | For all outcomes considered (benefits or harms), present, for each study: (a) simple summary data for each intervention group (b) effect estimates and confidence intervals, ideally with a forest plot.               | 7 - 10  |
| Synthesis of results               | 21 | Present results of each meta-analysis done, including confidence intervals and measures of consistency.                                                                                                                | 7 - 10  |
| Risk of bias across studies        | 22 | Present results of any assessment of risk of bias across studies (see Item 15).                                                                                                                                        | 7       |
| Additional analysis                | 23 | Give results of additional analyses, if done (e.g., sensitivity or subgroup analyses, meta-regression [see Item 16]).                                                                                                  | 7       |
| <b>DISCUSSION</b>                  |    |                                                                                                                                                                                                                        |         |
| Summary of evidence                | 24 | Summarize the main findings including the strength of evidence for each main outcome; consider their relevance to key groups (e.g., healthcare providers, users, and policy makers).                                   | 11 - 15 |
| Limitations                        | 25 | Discuss limitations at study and outcome level (e.g., risk of bias), and at review-level (e.g., incomplete retrieval of identified research, reporting bias).                                                          | 15      |

|                |    |                                                                                                                                            |    |
|----------------|----|--------------------------------------------------------------------------------------------------------------------------------------------|----|
| Conclusions    | 26 | Provide a general interpretation of the results in the context of other evidence, and implications for future research.                    | 15 |
| <b>FUNDING</b> |    |                                                                                                                                            |    |
| Funding        | 27 | Describe sources of funding for the systematic review and other support (e.g., supply of data), role of funders for the systematic review. | 5  |

Supplementary Appendix Table 2: MOOSE Checklist

| Reporting Criteria                                                                      | Reported (Yes/No) | Reported on Page |
|-----------------------------------------------------------------------------------------|-------------------|------------------|
| <b>Reporting of Background</b>                                                          |                   |                  |
| Problem definition                                                                      | Yes               | 4                |
| Hypothesis statement                                                                    | Yes               | 4 - 5            |
| Description of Study Outcome(s)                                                         | Yes               | 4 - 5            |
| Type of exposure or intervention used                                                   | No                | N/A              |
| Type of study design used                                                               | Yes               | 5                |
| Study population                                                                        | Yes               | 5                |
| <b>Reporting of Search Strategy</b>                                                     |                   |                  |
| Qualifications of searchers (eg, librarians and investigators)                          | Yes               | 1                |
| Search strategy, including time period included in the synthesis and keywords           | Yes               | 5 - 6            |
| Effort to include all available studies, including contact with authors                 | Yes               | 5 -6             |
| Databases and registries searched                                                       | Yes               | 5                |
| Search software used, name and version, including special features used (eg, explosion) | Yes               | 5 - 6            |
| Use of hand searching (eg, reference lists of obtained articles)                        | Yes               | 5                |
| List of citations located and those excluded, including justification                   | Yes               | 7                |
| Method for addressing articles published in languages other than English                | Yes               | 5                |
| Method of handling abstracts and                                                        | Yes               | 5                |

|                                                                                                                                                                                                                                                      |     |                                                                  |
|------------------------------------------------------------------------------------------------------------------------------------------------------------------------------------------------------------------------------------------------------|-----|------------------------------------------------------------------|
| unpublished studies                                                                                                                                                                                                                                  |     |                                                                  |
| Description of any contact with authors                                                                                                                                                                                                              | Yes | 5                                                                |
| <b>Reporting of Methods</b>                                                                                                                                                                                                                          |     |                                                                  |
| Description of relevance or appropriateness of studies assembled for assessing the hypothesis to be tested                                                                                                                                           | Yes | 5                                                                |
| Rationale for the selection and coding of data (eg, sound clinical principles or convenience)                                                                                                                                                        | Yes | 5                                                                |
| Documentation of how data were classified and coded (eg, multiple raters, blinding, and interrater reliability)                                                                                                                                      | Yes | 5                                                                |
| Assessment of confounding (eg, comparability of cases and controls in studies where appropriate)                                                                                                                                                     | Yes | 5                                                                |
| Assessment of study quality, including blinding of quality assessors. stratification or regression on possible predictors of study results Y                                                                                                         | Yes | 5                                                                |
| Assessment of heterogeneity                                                                                                                                                                                                                          | No  | Cannot be conducted within out study. Bias assessments conducted |
| Description of statistical methods (eg, complete description of fixed or random effects models, justification of whether the chosen models account for predictors of study results, dose-response models, or cumulative meta-analysis) in sufficient | Yes | 5                                                                |

|                                                                                                                             |     |                        |
|-----------------------------------------------------------------------------------------------------------------------------|-----|------------------------|
| detail to be replicated                                                                                                     |     |                        |
| Provision of appropriate tables and graphics                                                                                | Yes | See Tables and Figures |
| <b>Reporting of Results</b>                                                                                                 |     |                        |
| Table giving descriptive information for each study included                                                                | Yes | See Tables and Figures |
| Results of sensitivity testing (eg, subgroup analysis)                                                                      | Yes | See Tables and Figures |
| Indication of statistical uncertainty of findings                                                                           | Yes | See Tables and Figures |
| <b>Reporting of Discussion</b>                                                                                              |     |                        |
| Quantitative assessment of bias (eg, publication bias)                                                                      | Yes | 7                      |
| Justification for exclusion (eg, exclusion of non-English-language citations)                                               | Yes | 5                      |
| Assessment of quality of included studies                                                                                   | Yes | 7                      |
| <b>Reporting of Conclusions</b>                                                                                             |     |                        |
| Consideration of alternative explanations for observed results                                                              | Yes | 11 - 15                |
| Generalization of the conclusions (i.e., appropriate for the data presented and within the domain of the literature review) | Yes | 11 - 15                |
| Guidelines for future research                                                                                              | Yes | 15                     |
| Disclosure of funding source                                                                                                | Yes | 5                      |

**Supplementary Appendix Table 3: Databases searched for systematic review of population-based screening for Biliary Atresia**

| Database                                                                | Date range searched             | Date searched | Number of results |
|-------------------------------------------------------------------------|---------------------------------|---------------|-------------------|
| Cochrane Central Register of Controlled Trials                          | 1946 - current                  | 10.09.2022    | 306               |
| EBSCO–CINAHL (Cumulative Index to Nursing and Allied Health Literature) | 1971 - current                  | 10.09.2022    | 206               |
| Google Scholar                                                          | -                               | 10.09.2022    | 1670              |
| Ovid–EMBASE                                                             | 1974 – September 10th 2022      | 10.09.2022    | 1836              |
| Ovid–HMIC (Health Management Information Consortium)                    | 1979 to September 2022          | 10.09.2022    | 0                 |
| Ovid–MEDLINE                                                            | 1946 - current                  | 10.09.2022    | 953               |
| Ovid–MEDLINE E-pub ahead of print                                       | September 10 <sup>th</sup> 2022 | 10.09.2022    | 0                 |
| Ovid–MEDLINE In-Process and Other Non-Indexed Citations                 | 1946 - current                  | 10.09.2022    | 56                |
| PubMed                                                                  | 1963 - current                  | 10.09.2022    | 807               |
| Scopus                                                                  | -                               | 10.09.2022    | 1463              |

|                                                                                                      |                |            |      |
|------------------------------------------------------------------------------------------------------|----------------|------------|------|
| Web of Knowledge (science citation index expanded and conference proceedings citation index science) | 1969 - current | 10.09.2022 | 2080 |
|------------------------------------------------------------------------------------------------------|----------------|------------|------|

**Supplementary Appendix Table 4: Medline Ovid Search Strategy to identify studies on population-based screening for Biliary Atresia**

1. exp Infant/ or exp Infant, Newborn/
2. exp Child/
3. neonate.mp
4. baby.mp
5. newborn.mp
6. neonates.mp
7. neonatal.mp
8. Screen.mp.
9. Screening.mp
10. exp Mass Screening/
11. exp Neonatal Screening/
12. exp Jaundice/ or exp Jaundice, Obstructive/ or exp Jaundice, Neonatal/
13. exp Cholestasis, Extrahepatic/ or exp Cholestasis/ or exp cholestasis, Intrahepatic/
14. exp Liver/
15. exp Bilirubin/
16. biliary.mp or exp Biliary Tract Surgical Procedures/ or Biliary Tract Diseases/ or exp Biliary Atresia/ or exp Biliary Tract/ or exp Liver Cirrhosis, Biliary/
  
17. cohort\*.tw.
18. exp Epidemiologic Methods/
19. exp Case-Control Studies/
20. (case\$ and control\$).tw.
21. exp Cohort Studies/
22. exp Retrospective Studies/
23. exp Cross-Sectional Studies/
  
24. Animals/
25. animal stud\*.mp.
26. exp "Review"/
27. exp Case Reports/

28. 1 or 2 or 3 or 4 or 5 or 6 or 7
29. 8 or 9 or 10 or 11
30. 12 or 13 or 14 or 15 or 16
31. 17 or 18 or 19 or 20 or 21 or 22 or 23
32. 24 or 25 or 26 or 27
33. 28 and 29 and 30 and 31
34. 33 not 32
35. Limit 34 to (English language and yr= '1975 – current')

Supplementary Appendix Table 5: Characteristics of included studies exploring population-based screening for Biliary Atresia

| Study (study design)                                    | Country | Age at Testing                                                                          | Number Included                                       | Screening Method                                         | Outcomes                                                                                                                                                                                                                                    | Comments                                                                                                                                                                                                                 |
|---------------------------------------------------------|---------|-----------------------------------------------------------------------------------------|-------------------------------------------------------|----------------------------------------------------------|---------------------------------------------------------------------------------------------------------------------------------------------------------------------------------------------------------------------------------------------|--------------------------------------------------------------------------------------------------------------------------------------------------------------------------------------------------------------------------|
| Akiyama et al. 1994<br>(Cross-sectional study)          | Japan   | Healthy Group<br>(Mean) –<br>50.1<br>months<br><br>BA group<br>(mean) –<br>30<br>months | 200 Healthy Infants, 8 BA<br>and 8 Neonatal Hepatitis | Infrared reflectance<br>spectrometry of Stool<br>Samples | Sensitivity: 100%, Specificity: 95.2%                                                                                                                                                                                                       |                                                                                                                                                                                                                          |
| Suzuki et al. 2011<br>(Prospective cohort<br>study)     | Japan   | 39 weeks                                                                                | 1148                                                  | Measurement of urinary<br>sulfated bile acid (USBA)      | Sensitivity - 100%, Specificity - 96%, NPV - 4%,<br>PPV - 100%                                                                                                                                                                              | Author's state high FPR<br>may be secondary to<br>the use of an ordinary<br>mail collection and<br>delivery system with no<br>temperature regulation<br>and the 3- to 6-day<br>interval between<br>sampling and receipt. |
| Masucci et al. 2019<br>(Cost-Effectiveness<br>Analysis) | N/A     | N/A                                                                                     | N/A                                                   | N/A                                                      | SCC cost approximately \$192,000 more than<br>no universal screening but led to eight life-<br>years gained (incremental cost-effectiveness<br>ratio (ICER) \$24,065 per life-year gained).<br>Screening using conjugated bilirubin testing |                                                                                                                                                                                                                          |

|                                                   |        |                                                              |                                                       |                                             |                                                                                                                                                                                                                                                                                                                                                               |  |
|---------------------------------------------------|--------|--------------------------------------------------------------|-------------------------------------------------------|---------------------------------------------|---------------------------------------------------------------------------------------------------------------------------------------------------------------------------------------------------------------------------------------------------------------------------------------------------------------------------------------------------------------|--|
|                                                   |        |                                                              |                                                       |                                             | versus the colour card cost \$2,369,199 more and led to five more life-years gained (ICER - \$473,840 per life year gained), and so was not cost-effective.                                                                                                                                                                                                   |  |
| Gu et al. 2015<br>(Prospective Cohort Study)      | Japan  | Unclear, appears physician stools reviewed at 1 month of age | 264071                                                | SCC                                         | Sensitivity - 76.5% (95% CI: 62.2 - 90.7), Specificity - 99.9% (95% CI: 99.9 - 100.0) NPV - 99.9% (95% CI: 99.9 - 99.9), PPV - 12.7% (8.2% - 17.3%)<br><br>Age at Kasai before SCC 70.3 days. After SCC 59.7 (p = 0.03)<br><br>Improved 5-, 10- and 15-year native liver survival (87.6%, 76.9% and 48.5%) compared to studies conducted in US, UK and France |  |
| Tseng et al. 2011<br>(Retrospective Cohort Study) | Taiwan | Unclear, appears physician reviewed stools at 1 month of age | 2,246,924 born before SCC.<br>1029879 born after SCC. | SCC                                         | Median age at first presentation decreased (47 vs. 43, p = 0.028). Late referrals decreased from 9.5% to 4.9%.<br><br>The median age of Kasai operation decreased (51 vs. 48. p = 0.051). The proportions of Kasai operation within 60 days decreased (68.9% vs. 73.6%, p = 0.31)                                                                             |  |
| Chen et al. 2006<br>(Prospective Cohort Study)    | Taiwan | Stools reviewed at 1 month of age                            | Type 1: 29412    Type 2: 37632                        | SCC (Type 1: Labeled and Type 2: Unlabeled) | For the detection of BA before 60 days: <ul style="list-style-type: none"> <li>Type 1: Sensitivity 86.7%, Specificity 99.9%. NPV - 99.9%, PPV - 41.9%.</li> <li>Type 2: Sensitivity: 88.8%, Specificity: 99.9%, NPV: 99.9%, PPV: 20.0</li> </ul>                                                                                                              |  |

|                                                 |                           |                                            |                                                  |                                                               |                                                                                                                                                                                                                                                                                                                                                         |  |
|-------------------------------------------------|---------------------------|--------------------------------------------|--------------------------------------------------|---------------------------------------------------------------|---------------------------------------------------------------------------------------------------------------------------------------------------------------------------------------------------------------------------------------------------------------------------------------------------------------------------------------------------------|--|
|                                                 |                           |                                            |                                                  |                                                               | 17 (58.6%) infants received a Kasai operation before 60 days of age.                                                                                                                                                                                                                                                                                    |  |
| Woolfson et al. 2018 (Prospective Cohort Study) | Canada (British Columbia) | Stools reviewed daily up to 1 month of age | 87,583                                           | SCC                                                           | Sensitivity: 50%, Specificity: 99%, NPV: 99% and PPV: 4%<br><br>Set-up and Operational Costs in 1st Year: \$80,154.63. Operational costs in 2nd year: \$330,033.82.<br>Additional cost of \$50,120.81 for program launch in its inaugural first year. After program start up, ISCC cost per birth, including ongoing administrative expenses was \$0.86 |  |
| Harpavat et al. 2016 (Cross-sectional study)    | USA                       | Newborns (exact age not detailed)          | BA Cohort: 61 Non-BA Cohort: 9102                | Conjugated Blood Measurements                                 | Sensitivity - 100% (95% CI: 87.7 - 100), Specificity - 98.2% (95% CI: 97.9 - 98.4)                                                                                                                                                                                                                                                                      |  |
| Matsui et al. 1993 (Prospective Cohort Study)   | Japan                     | 1 month of age                             | 104,309                                          | Total 3x- OH bile acids were extracted from dried blood spots | Sensitivity: 63.6%, PPV: 0.62%                                                                                                                                                                                                                                                                                                                          |  |
| Kong et al. 2016 (Prospective Cohort Study)     | China                     | Daily check until 4 months of age          | 29 799                                           | SCC                                                           | Sensitivity: 100%, Specificity: 99.9%, PPV - 8.3% (95% CI: 2.7-19.4)                                                                                                                                                                                                                                                                                    |  |
| Lee et al. 2016 (Prospective Cohort Study)      | Taiwan                    | Review at 2 months                         | 513 BA cases (Comparison done by BA cases before | SCC                                                           | SCC reduced the average Kasai operation age (59.9 vs. 48.2, p = 0.064).                                                                                                                                                                                                                                                                                 |  |

|                                                 |        |                                   |                                                                |                                   |                                                                                                                                                                                                                                                                                                                                                                     |
|-------------------------------------------------|--------|-----------------------------------|----------------------------------------------------------------|-----------------------------------|---------------------------------------------------------------------------------------------------------------------------------------------------------------------------------------------------------------------------------------------------------------------------------------------------------------------------------------------------------------------|
| Study)                                          |        | of age                            | and after screening introduced)                                |                                   | SCC reduced hospitalization rate in the first 2 years of life (6.4 vs. 5.0, $p < 0.001$ ). SCC also reduced the death rate within the UK (47.8 vs. 21.2, $p < 0.001$ ) and percentage of infants having neither LTX nor death (31.6% vs. 56.4%, $P < 0.001$ ). Finally, there was no significant difference in the rate of LTx (28.6% vs. 28.2, $p = 0.934$ ).      |
| Zhou et al. 2012 (Cross sectional study)        | China  | 4 days after birth                | 292 normal infants, 17 neonatal jaundice and 8 biliary atresia | Bile acids from dried blood spots | With a cutoff of 0.63 mmol/L, produces a sensitivity: 79.1 (74.3 - 83.2), specificity: 62.5 (25 - 87.5)                                                                                                                                                                                                                                                             |
| Lien et al. 2016 (Prospective Cohort Study)     | Taiwan | Unclear, appears daily from birth | 191 BA Infants                                                 | SCC                               | 3-year overall survival improved after SCC implementation (64.0% vs. 89.2% $P < 0.001$ ). The 5-year survival rates with native liver in cohorts A and B were (37.5% vs. 64.3%, $P = 0.01$ ). The 5-year overall survival rates were 89.3% vs. 55.7%, ( $P < 0.001$ ).                                                                                              |
| Harpavat et al. 2020 (Prospective Cohort Study) | USA    | After Birth                       | 123,279 infants                                                | Conjugated Blood Measurements     | Sensitivity: 100.0% (95% CI, 56.1%-100.0%), Specificity: 99.9% (95% CI, 99.9%-99.9%), PPV: 5.9% (95% CI, 2.6%-12.2%), NPV: 100.0% (95% CI, 100.0%- 100.0%)<br><br>Screening reduced age at presentation (56 vs. 36 days, $p = 0.004$ ) and proportion having Kasai < 30 days (12.5% vs. 57.9%, $p = 0.003$ ).<br><br>Screening reduced the age the patient referred |

|                                              |       |                         |         |                                                                                                                                      |                                                                                                                                                                                                                                                                                                                                                                                                                                                                                                             |
|----------------------------------------------|-------|-------------------------|---------|--------------------------------------------------------------------------------------------------------------------------------------|-------------------------------------------------------------------------------------------------------------------------------------------------------------------------------------------------------------------------------------------------------------------------------------------------------------------------------------------------------------------------------------------------------------------------------------------------------------------------------------------------------------|
|                                              |       |                         |         |                                                                                                                                      | to a specialist (44 vs. 25 days, p 0.003). After Kasai, infants in screening group had significantly faster time of bilirubin normalization, but no sig. difference in transplant free survival. Screening infants more likely to have a normal conjugated bilirubin by 90 days (41.7% vs. 78.9%, p = 0.03).                                                                                                                                                                                                |
| Mogul et al. 2015 (Cost effectiveness Study) | N/A   | N/A                     | N/A     | SCC                                                                                                                                  | With no screening, the 20-year cost was \$142,479,725 with 3702 life- years, 74 deaths and 158 liver transplants. With SCC B, the cost was \$133,893,563 with 3731.7 life-years, 71 deaths and 147 liver transplants. There was a >97% probability that screening with the stool color card would be cost saving and associated with an increase in life-years gained. Among all parameters, only stool color card specificity was associated with the potential for screening to no longer be cost saving. |
| Gong et al. 2020 (Cross Sectional Study)     | China | 3 – 14 days after birth | 52, 862 | Free carnitine, unconjugated bilirubin (UBIL), Bilirubin monoglucuronide (BMG), and Bilirubin diglucuronide (BDG) in dry blood spots | <p>Direct Bilirubin:</p> <ul style="list-style-type: none"> <li>Using 30 u/mol as cut off - Sensitivity: 100%, Specificity: 52%.</li> <li>Using 140 u/mol as cut off - sensitivity: 75%, Specificity: 99%.</li> </ul> <p>Free Carnitine:</p> <ul style="list-style-type: none"> <li>Using 38 u/mol as cut off: sensitivity 85%, Specificity: 85%.</li> <li>Using 38 u/mol as cut off - Sensitivity: 75%, Specificity: 94%.</li> </ul>                                                                       |

|                                                   |                |                                    |                                                        |                                         |                                                                                                                                                                                                                                                                                                                                |  |
|---------------------------------------------------|----------------|------------------------------------|--------------------------------------------------------|-----------------------------------------|--------------------------------------------------------------------------------------------------------------------------------------------------------------------------------------------------------------------------------------------------------------------------------------------------------------------------------|--|
|                                                   |                |                                    |                                                        |                                         |                                                                                                                                                                                                                                                                                                                                |  |
| Zheng et al. 2020<br>(Retrospective cohort study) | China          | Unclear – appears daily from birth | 118 BA cases                                           | SCC                                     | SCC reduced age at Kasai (56 vs. 81, $p < 0.05$ ), Length of stay in hospital (44 vs. 49, $p < 0.05$ ). It improved 2-year native liver survival rate (44.4% vs. 52.6%, $p < 0.05$ ) and survival (20.6% vs. 10.5%, $p < 0.05$ ).                                                                                              |  |
| Chiu et al. 2013<br>(Retrospective Cohort Study)  | Taiwan         | Daily from birth                   | 197 BA Cases                                           | SCC                                     | Sensitivity in detecting BA using SCC before 60 days: 92.8%. 96.3% in the preterm infants                                                                                                                                                                                                                                      |  |
| Muraji et al. 2003 (Cross Sectional Study)        | Japan          | 21 – 138 days                      | 58 infants with Breast feeding Jaundice. 16 BA infants | Urinary excretion of sulfated bile acid | Sensitivity - 100%, FPR - 1.0%                                                                                                                                                                                                                                                                                                 |  |
| Hsiao et al. 2008<br>(Prospective Cohort Study)   | Taiwan         | Daily from Birth                   | 422273 Infants                                         | SCC                                     | 2004: Sensitivity - 72.5%, 2005 - 97.1%<br><br>Proportion of Kasai < 60 days: 47.2% prior to SCC, vs. 60% in 2004 and 74.3% in 2005 (once SCC introduced)<br><br>1976 - 2000 ( $p = 0.004$ ). Delayed operation rate beyond 90 days decreased over time, from 15.3% in 1976-2000 to 10.3% in 2002-2003 and 0% in 2004 and 2005 |  |
| Powell et al. 2003<br>(Prospective Cohort Study)  | United Kingdom | Babies under 28 days               | 27654                                                  | Conjugated Bilirubin                    | Using bilirubin cut off of 18 $\mu\text{mol/l}$ : True positives: 2, False negatives: 0<br>False positives: 10, True negatives: 23,107                                                                                                                                                                                         |  |

|                                                  |                |                                                        |                                         |                                                      |                                                                                                                                                                                                                                                           |                                                                                                                                                                                                                                                        |
|--------------------------------------------------|----------------|--------------------------------------------------------|-----------------------------------------|------------------------------------------------------|-----------------------------------------------------------------------------------------------------------------------------------------------------------------------------------------------------------------------------------------------------------|--------------------------------------------------------------------------------------------------------------------------------------------------------------------------------------------------------------------------------------------------------|
| Schreiber et al. 2014 (Prospective Cohort Study) | Canada         | Daily up to 4 weeks                                    | 6187                                    | SCC                                                  | Liver transplants decreased from 55 (no screening) to 52 (SCC).<br><br>For a Canadian population, the increase in cost for passive screening, compared with no screening, is \$213,584 and the gain in life years is 9.7 (\$22,000 per life-year gained). |                                                                                                                                                                                                                                                        |
| Mushtaq et al. 1999 (Case-Control Study)         | United Kingdom | Infants < 1 year                                       | 218 infants with cholestasis            | Mass Spectrometry on Blood Spots                     | Sensitivity/Specificity/PPV/NPV: cut off of 25 umol/l produced figures of 85.3%, 94.0%, 14.2, and 0.16, and a cut off of 35 umol/l 70.5%, 97.8%, 32.0, and 0.30, respectively                                                                             | Unfortunately, there is too much overlap between bile acid concentrations in infants with cholestasis and those in control infants for this to be used as a single screening test for cholestatic hepatobiliary disease in general and biliary atresia |
| Shen et al. 2016 (Cross Sectional Study)         | China          | Neonates ranging from 18 – 94 days                     | 40 BA cases, 40 Neonates with Pneumonia | Light Spectrometry (with phone application – POOPMD) | Sensitivity - 100%, Specificity - 34/40                                                                                                                                                                                                                   |                                                                                                                                                                                                                                                        |
| Gu et al. 2017 (Case-Control Study)              | Japan          | Unclear – appears daily until 1 month physician review | 148 BA cases                            | SCC                                                  | Kasai < 60 days: 55.9% vs. 40.4% (p = 0.109), Native liver survival 197.2 months before SCC vs. 81 months after SCC, p = 0.017)                                                                                                                           |                                                                                                                                                                                                                                                        |

|                  |       |                            |             |                                                                                    |                                                                                                         |  |
|------------------|-------|----------------------------|-------------|------------------------------------------------------------------------------------|---------------------------------------------------------------------------------------------------------|--|
| Liao et al. 2022 | China | Newborns<br>0 – 60<br>days | 38 BA cases | Direct Bilirubin                                                                   | Using $\geq 1$ mg dL as cut-off:<br>Sensitivity 100%<br>Specificity 77.26%                              |  |
| Xiao et al. 2022 | China | 36 – 40<br>weeks           | 21 BA cases | THCA, 2-<br>hydroxyglutaric acid,<br>and indoleacetic acid in<br>dried blood spots | Sensitivity of 90.48% (95% CI: 69.62% –<br>98.83%) and specificity of 92% (95% CI: 84.84%<br>– 96.48%). |  |

SCC: Stool Colour Chart, PPV: Positive Predictive Value; NPV; Negative Predictive Value, 95% CI: 95% Confidence Intervals

**Supplementary Appendix Table 6a:** Quality assessment scores for cohort studies exploring population-based screening for Biliary Atresia

| Study (Year)           | Selection |    |    |   | Comparability |    | Exposure/Outcome |   |                    | Subtotal Assessment |      |      | Conclusion |      |
|------------------------|-----------|----|----|---|---------------|----|------------------|---|--------------------|---------------------|------|------|------------|------|
|                        | 1         | 2  | 3  | 4 | 1a            | 1b | 1                | 2 | 3                  | S                   | C    | E/O  |            |      |
| <b>Cohort Studies</b>  |           |    |    |   |               |    |                  |   |                    |                     |      |      |            |      |
| Suzuki et al. (2019)   | *         | *  | *  | * | *             | *  | *                | * | *                  |                     | Good | Good | Good       | Good |
| Gu et al. (2015)       | *         | *  | *  | * | *             | *  | *                | * | *                  |                     | Good | Good | Good       | Good |
| Tseng et al. (2011)    | *         | No | *  | * | No            | No | *                | * | *                  |                     | Good | Poor | Good       | Good |
| Chen et al. (2006)     | *         | *  | *  | * | *             | *  | *                | * | *                  |                     | Good | Good | Good       | Good |
| Woolfson et al. (2018) | *         | *  | *  | * | *             | *  | *                | * | *                  |                     | Good | Good | Good       | Good |
| Matsui et al. (1993)   | *         | *  | No | * | *             | *  | *                | * | Follow-up rate 80% |                     | Good | Good | Fair       | Good |
| Kong et al. (2016)     | *         | *  | *  | * | *             | *  | *                | * | *                  |                     | Good | Good | Good       | Good |
| Lee et al. (2016)      | *         | *  | *  | * | *             | *  | *                | * | No statement       |                     | Good | Good | Fair       | Good |

|                         |   |                          |                |   |                 |                  |   |   |                 |      |      |      |      |
|-------------------------|---|--------------------------|----------------|---|-----------------|------------------|---|---|-----------------|------|------|------|------|
| Lien et al. (2011)      | * | No (different provinces) | *              | * | Different Years | Different Region | * | * | *               | Good | Poor | Good | Good |
| Harpavat et al. (2020)  | * | Different Source         | *              | * | Different Years | Different Region | * | * | *               | Good | Poor | Good | Fair |
| Zheng et al. (2020)     | * | *                        | No description | * | Different Years | *                | * | * | *               | Good | Poor | Good | Fair |
| Chiu et al. (2013)      | * | No                       | *              | * | N/A             | N/A              | * | * | No Statement    | Good | -    | Good | Good |
| Hsaio et al. (2008)     | * | *                        | *              | * | Different Years | Different Region | * | * | *               | Good | Poor | Good | Good |
| Powell et al. (2003)    | * | No unexposed group       | *              | * | N/A             | N/A              | * | * | 84.70%          | Good | -    | Good | Good |
| Schreiber et al. (2014) | * | No unexposed group       | *              | * | N/A             | N/A              | * | * | 40% return rate | Good | -    | Good | Good |
| Liao et al. (2022)      | * | No unexposed group       | *              | * | N/A             | N/A              | * | * | *               | Good | -    | Good | Good |

**Supplementary Appendix Table 6b:** Quality assessment scores for cross sectional studies exploring population-based screening for Biliary Atresia

| Study (Year)                   | Selection |    |   |    | Comparability | Exposure/Outcome |   | Subtotal Assessment Conclusion |      |      | Conclusions |
|--------------------------------|-----------|----|---|----|---------------|------------------|---|--------------------------------|------|------|-------------|
|                                | 1         | 2  | 3 | 4  | 1a            | 1                | 2 | 1                              | 2    | 3    |             |
| <b>Cross sectional studies</b> |           |    |   |    |               |                  |   |                                |      |      |             |
| Akiyama et al. (1994)          | *         | No | * | ** | No            | *                | * | Good                           | Poor | Good | Good        |
| Harpavat et al. (2016)         | *         | No | * | ** | No            | *                | * | Good                           | Poor | Good | Good        |
| Zhou et al. (2012)             | *         | No | * | ** | **            | **               | * | Good                           | Good | Good | Good        |
| Gong et al. 2020               | *         | No | * | ** | No            | **               | * | Good                           | Poor | Good | Good        |
| Muraji et al. (2013)           | *         | No | * | ** | No            | **               | * | Good                           | Poor | Good | Good        |

|                    |   |    |   |    |    |   |   |      |      |      |      |
|--------------------|---|----|---|----|----|---|---|------|------|------|------|
| Shen et al. (2016) | * | No | * | ** | ** | * | * | Good | Good | Good | Good |
| Xiao et al. (2022) | * | No | * | ** | ** | * | * | Good | Good | Good | Good |

**Supplementary Appendix Table 6c:** Quality assessment scores for case-control studies exploring population-based screening for Biliary Atresia

| Study (Year)                | Selection |   |     |   | Comparability |    | Exposure/Outcome |   |   | Subtotal Assessment |      |      | Conclusion |
|-----------------------------|-----------|---|-----|---|---------------|----|------------------|---|---|---------------------|------|------|------------|
|                             | 1         | 2 | 3   | 4 | 1a            | 1b | 1                | 2 | 3 | S                   | C    | E/O  |            |
| <b>Case-Control Studies</b> |           |   |     |   |               |    |                  |   |   |                     |      |      |            |
| Mushtaq et al. 1999         | No        | * | N/A | * | *             | No | *                | * | * | Good                | Fair | Good | Good       |
| Gu et al. 2017              | No        | * | N/A | * | *             | No | *                | * | * | Good                | Fair | Good | Good       |

**Supplementary Appendix Table 7: Summary of study data for a meta-analysis on the sensitivity and specificity of BA screening methods**

| Study Number | Reference        | Method                          | Numbers of     |                 |                 |                |
|--------------|------------------|---------------------------------|----------------|-----------------|-----------------|----------------|
|              |                  |                                 | True Positives | False Negatives | False Positives | True Negatives |
| 4            | Gu 2015          | Stool Colour Chart              | 26             | 8               | 177             | 263859         |
| 6            | Chen 2006        |                                 | 26             | 3               | 65              | 78090          |
| 10           | Kong 2016        |                                 | 2              | 0               | 22              | 22775          |
| 18           | Chiu 2013        |                                 | 181            | 13              | n/a             | n/a            |
| 20           | Hsiao 2008       |                                 | 63             | 12              | 279             | 422273         |
| 21           | Powell 2003      | Blood Measurements of Bilirubin | 2              | 0               | 10              | 23107          |
| 8            | Harpavat 2016    |                                 | 35             | 0               | 166             | 8936           |
| 14           | Harpavat 2020    |                                 | 7              | 0               | 122             | 123140         |
| 25           | Liao et al. 2022 |                                 | 36             | 0               | 929             | 3157           |
| 1            | Akiyama 1994     | Stool Colour Saturation         | 8              | 0               | 10              | 198            |
| 24           | Shen 2016        |                                 | 38             | 0               | 6               | 34             |
| 2            | Suzuki 2011      | Urinary Sulphated Bile Acids    | 1              | 0               | 6               | 1141           |
| 9            | Matusi 1993      | Bile Blood Spot Measurements    | 7              | 4               | 1129            | 103173         |
| 12           | Zhou 2012        |                                 | n/a            | n/a             | n/a             | n/a            |
| 16           | Gong 2020 (I)    |                                 | 97             | 0               | 4894            | 5204           |
| 16           | Gong 2020 (II)   |                                 | 73             | 24              | 100             | 9908           |
| 23           | Mushtaq 1999     |                                 | n/a            | n/a             | n/a             | n/a            |
| 16           | Gong 2020 (III)  | Carnitine Measurements          | 29             | 10              | 600             | 9408           |

Gong 2020 (I) results with cut-off bilirubin > 30 µmol/l.

Gong 2020 (II) results with cut-off bilirubin > 140 µmol/l.

Gong 2020 (III) results with cut-off free carnitine > 45 µmol/l.

**Supplementary Appendix Table 8: Sensitivity and specificity for studies, with 95% confidence intervals.**

| Reference         | Method                          | Sensitivity            |                     | Specificity         |                     |
|-------------------|---------------------------------|------------------------|---------------------|---------------------|---------------------|
|                   |                                 | Estimate               | Confidence Interval | Estimate            | Confidence Interval |
| Gu 2015           | Stool Colour Chart              | 76.47%                 | (58.83%,89.25%)     | 99.93%              | (99.92%,99.94%)     |
| Chen 2006         |                                 | 89.66%                 | (72.65%,97.81%)     | 99.92%              | (99.89%,99.94%)     |
| Kong 2016         |                                 | 100.00%                | (15.81%,100.00%)    | 99.90%              | (99.85%,99.94%)     |
| Chiu 2013         |                                 | 93.30%                 | (88.81%,96.38%)     | n/a                 | n/a                 |
| Hsiao 2008        |                                 | 84.00%                 | (73.72%,91.45%)     | 99.93%              | (99.93%,99.94%)     |
| Meta-analysis     |                                 | 87.90%                 | (80.40%, 92.80%)    | 99.99%              | (99.99 – 99.99%)    |
| Powell 2003       | Blood Measurements of Bilirubin | 100.00%                | (15.81%,100.00%)    | 99.96%              | (99.92%,99.98%)     |
| Harpavat 2016     |                                 | 100.00%                | (90.00%,100.00%)    | 98.18%              | (97.88%,98.44%)     |
| Harpavat 2020     |                                 | 100.00%                | (59.04%,100.00%)    | 99.90%              | (99.88%,99.92%)     |
| Liao 2022         |                                 | 100.00%                | (90.26%,100.00%)    | 77.26%              | (75.95%,78.54%)     |
| Meta-analysis     |                                 | 100.00%                | (00.00%, 100.00%)   | 99.3%               | (91.90% - 99.99%)   |
| Akiyama 1994      | Stool Colour Saturation         | 100.00%                | (63.06%,100.00%)    | 95.19%              | (91.34%,97.67%)     |
| Shen 2016         |                                 | 100.00%                | (90.75%,100.00%)    | 85.00%              | (70.16%,94.29%)     |
| Meta-analysis     |                                 | 100.00%                | (0.00%, 100.00%)    | 92.4%               | (83.4% - 96.7%)     |
| Suzuki 2011       | Urinary Sulphated Bile Acids    | 100.00%                | (2.50%,100.00%)     | 99.48%              | (98.86%,99.81%)     |
| Matusi 1993       | Bile Blood Spot Measurements    | 63.64%                 | (30.79%,89.07%)     | 98.92%              | (98.85%,98.98%)     |
| Zhou 2012         |                                 | 79.10% <sup>1</sup>    | (74.30%,83.20%)     | 62.50% <sup>1</sup> | (25.00%,87.50%)     |
| Gong 2020 (I)     |                                 | 100.00%                | (96.27%,100.00%)    | 51.53%              | (50.55%,52.51%)     |
| Gong 2020 (II)    |                                 | 75.26%                 | (65.46%,83.46%)     | 99.00%              | (98.79%,99.19%)     |
| Mushtaq 1999 (I)  |                                 | 85.30% <sup>1</sup>    | (75.50%,92.00%)     | 94.00% <sup>1</sup> | (92.30%,95.30%)     |
| Mushtaq 1999 (II) |                                 | 78.70% <sup>1</sup>    | (68.10%,86.90%)     | 96.30% <sup>1</sup> | (94.90%,97.40%)     |
| Meta-analysis     |                                 | 93.20%                 | (34.80%, 99.70%)    | 95.50%              | (65.80% - 99.50%)   |
| Gong 2020 (III)   |                                 | Carnitine Measurements | 74.36%              | (57.87%,86.96%)     | 94.00%              |

<sup>1</sup> Sensitivity / specificity and their confidence intervals are derived from ROC curve.

Gong 2020 (I) results with cut-off bilirubin > 30 µmol/l.

Gong 2020 (II) results with cut-off bilirubin > 140 µmol/l.

Gong 2020 (III) results with cut-off free carnitine > 45 µmol/l.

Mushtaq 1999 (I) results with cut-off bilirubin > 25 µmol/l.

Mushtaq 1999 (II) results with cut-off bilirubin > 30  $\mu\text{mol/l}$ .

Supplementary Appendix Table 9: Breakdown of factors included within cost-effectiveness analyses of BA screening methods

| Paper            | Type of BA Screening                      | Model Used                                  | Cost of screening setup | Considered LTx costs | Considered Immunosuppression Cost | Considered Liver Transplant Follow-up | Considered Liver Transplant Complications |
|------------------|-------------------------------------------|---------------------------------------------|-------------------------|----------------------|-----------------------------------|---------------------------------------|-------------------------------------------|
| Woolfson et al.  | SCC                                       | Simple cost of set-up first and second year | Y                       | N                    | N                                 | N                                     | Y                                         |
| Schreiber et al. | SCC                                       | Markov Model                                | Y                       | N                    | N                                 | N                                     | Y                                         |
| Masucci et al.   | SCC and Conjugated Bilirubin Measurements | Markov Model                                | Y                       | Y                    | Y                                 | Y                                     | Y                                         |
| Mogul et al.     | SCC                                       | Markov Model                                | Y                       | Y                    | Y                                 | Y                                     | Y                                         |

SCC: Stool Colour Chart, LTx: Liver Transplantation, Y: Yes, N: No
